# Supplementary material for: Endoscopic Submucosal Dissection vs Endoscopic Mucosal Resection for Colorectal Polyps. A Meta-Analysis&nbsp;
Source: Research Square preprint supplement (doi:10.21203/rs.3.rs-139442/v1), 2021-01-14
Supplement: Supplementary file 1 [file 15662ba687669adff300d0c0.docx]

**Supplementary Material 1**

Search strategy for Medline

1: (endoscop* mucosal resection or emr).tw.

2: (endoscop* submucosal dissection or esd).tw.

3: (colo* or rect* or colorect*).tw.

4: 1 and 2 and 3

5: limit 4 to English

Search strategy for Embase

1: ‘endoscop* mucosal resection’:ti,ab OR emr:ti,ab

2: ‘endoscop* submucosal dissection’:ti,ab OR esd:ti,ab

3: colo*:ti,ab OR rect*:ti,ab OR colorect*:ti,ab

4: 1 and 2 and 3

5: 4 and [English]/lim
