# Supplementary material for: Endoscopic Submucosal Dissection vs Endoscopic Mucosal Resection for Colorectal Polyps. A Meta-Analysis&nbsp;
Source: Research Square preprint supplement (doi:10.21203/rs.3.rs-139442/v1), 2021-01-14
Supplement: Supplementary file 2 [file 393344d41e5aee79cd5a7ae9.docx]

**Supplementary Material 3**

Sensitivity analysis for articles ≥ 20mm

|  | **Total Papers** | **Sample Size (ESD)** | **Pooled Proportions** | **Sample Size (EMR)** | **Pooled Proportions** | **RR (CI)** | **P value** | **Publication Bias** |
| --- | --- | --- | --- | --- | --- | --- | --- | --- |
| **Sensitivity Analysis (≥ 20mm only)** | | | | | | | | |
| En bloc resection | 6 | 941 | 86%  (0.79 - 0.91) | 1122 | 45%  (0.31 - 0.59) | 1.932  (1.389 - 2.688) | <0.001 | - |
| Positive lateral margin | 2 | 123 | 3%  (0.00 - 0.06) | 187 | 14%  (0.09 - 0.19) | 0.292  (0.089 - 0.955) | 0.042 | - |
| Positive vertical margin | 1 | 38 | 5%  (0.00 - 0.15) | 83 | 1%  (0.00 - 0.05) | 4.368  (0.409 - 46.710) | 0.223 | - |
| Complete resection | 4 | 771 | 83%  (0.73 - 0.92) | 790 | 59%  (0.26 - 0.88) | 1.548  (0.808 - 2.964) | 0.188 | - |
| Lymphovsacular  invasion | 1 | 54 | 6%  (0.02 - 0.12) | 23 | 0%  (0.00 - 0.02) | 4.800  (0.276 - 83.404) | 0.282 | - |
| Mean procedural time | 3 | 387 | - | 549 | - | 73.247  (59.249 - 87.245) | <0.001 | - |
| Additional surgery | 2 | 99 | 13%  (0.07 - 0.21) | 153 | 5%  (0.02 - 0.09) | 3.139  (1.360 - 7.243) | 0.007 | - |
| Perforation | 8 | 1054 | 5%  (0.03 - 0.08) | 1548 | 1%  (0.00 - 0.02) | 4.513  (2.531 - 8.046) | <0.001 | - |
| Bleeding | 7 | 1016 | 3%  (0.01 - 0.05) | 1465 | 2%  (0.01 - 0.04) | 1.247  (0.618 - 2.516) | 0.538 | - |
| Recurrences | 8 | 1025 | 2%  (0.00 - 0.03) | 1496 | 11%  (0.06 - 0.16) | 0.191  (0.085 - 0.431) | <0.001 | - |

ESD: endoscopic submucosal dissection; EMR: endoscopic mucosal resection; RR: relative risk, CI: confidence interval
